# Supplementary material for: Impact of Histotripsy on Development of Intrahepatic Metastases in a Rodent Liver Tumor Model
Source: MDPI journal article supplement (doi:10.3390/cancers14071612), 2022-03-22
Supplement: s1 [file s1]

# Impact of Histotripsy on Development of Intrahepatic Metastases in a Rodent Liver Tumor Model

Tejaswi Worlikar, Man Zhang, Anutosh Ganguly, Timothy Hall, Jiaqi Shi, Lili Zhao, Fred Lee, Mishal Mendiratta-Lala, Clifford S. Cho and Zhen Xu

Table S1. Tumor Response Summary.

| Group       | ID  | Survival<br>(Week) | Week 0<br>(mm <sup>3</sup> ) | Week 1<br>(mm <sup>3</sup> ) | Week 2<br>(mm <sup>3</sup> ) | Week 3<br>(mm <sup>3</sup> ) | Week 4<br>(mm <sup>3</sup> ) | Week 5<br>(mm <sup>3</sup> ) | Week 6<br>(mm <sup>3</sup> ) | Week 7<br>(mm <sup>3</sup> ) | Week 8<br>(mm <sup>3</sup> ) | Week 9<br>(mm <sup>3</sup> ) | Week 10<br>(mm <sup>3</sup> ) | Week 11<br>(mm <sup>3</sup> ) | Week 12<br>(mm <sup>3</sup> ) |
|-------------|-----|--------------------|------------------------------|------------------------------|------------------------------|------------------------------|------------------------------|------------------------------|------------------------------|------------------------------|------------------------------|------------------------------|-------------------------------|-------------------------------|-------------------------------|
| Histotripsy | H1  | 12                 | 40.27                        | 17.55                        | 0                            | 0                            | 0                            | 0                            | 0                            | 0                            | 0                            | 0                            | 0                             | 0                             | 0                             |
|             | H2  | 12                 | 157.50                       | 66.40                        | 3.55                         | 0                            | 0                            | 0                            | 0                            | 0                            | 0                            | 0                            | 0                             | 0                             | 0                             |
|             | H3  | 12                 | 48.92                        | 1.05                         | 0                            | 0                            | 0                            | 0                            | 0                            | 0                            | 0                            | 0                            | 0                             | 0                             | 0                             |
|             | H4  | 12                 | 161.23                       | 60.20                        | 6.00                         | 0                            | 0                            | 0                            | 0                            | 0                            | 0                            | 0                            | 0                             | 0                             | 0                             |
|             | H5  | 12                 | 150.90                       | 102.0                        | 81.64                        | 0                            | 0                            | 0                            | 0                            | 0                            | 0                            | 0                            | 0                             | 0                             | 0                             |
|             | H6  | 12                 | 120.41                       | 38.68                        | 0                            | 0                            | 0                            | 0                            | 0                            | 0                            | 0                            | 0                            | 0                             | 0                             | 0                             |
|             | H7  | 6                  | 50.63                        | 111.3                        | 71.11                        | 97.04                        | 302.57                       | 2490                         | 7967                         | -                            | -                            | -                            | -                             | -                             | -                             |
|             | H8  | 6                  | 42.91                        | 127.5                        | 175.08                       | 2032                         | 1329.8                       | 1950                         | 6487                         | -                            | -                            | -                            | -                             | -                             | -                             |
|             | H9  | 12                 | 57.61                        | 57.27                        | 20.93                        | 0                            | 0                            | 0                            | 0                            | 0                            | 0                            | 0                            | 0                             | 0                             | 0                             |
|             | H10 | 7                  | 51.28                        | 34.16                        | 2.198                        | 0                            | 0                            | 0                            | 0                            | 0                            | -                            | -                            | -                             | -                             | -                             |
|             | H11 | 7                  | 67.95                        | 37.68                        | 0                            | 0                            | 0                            | 0                            | 0                            | 0                            | -                            | -                            | -                             | -                             | -                             |
| Control     | C1  | 3                  | 73.85                        | 1094                         | 1441                         | 2747                         | -                            | -                            | -                            | -                            | -                            | -                            | -                             | -                             | -                             |
|             | C2  | 1                  | 233.35                       | 11528                        | -                            | -                            | -                            | -                            | -                            | -                            | -                            | -                            | -                             | -                             | -                             |
|             | C3  | 1                  | 164.06                       | 4391                         | -                            | -                            | -                            | -                            | -                            | -                            | -                            | -                            | -                             | -                             | -                             |
|             | C4  | 1                  | 193.63                       | 4729                         | -                            | -                            | -                            | -                            | -                            | -                            | -                            | -                            | -                             | -                             | -                             |
|             | C5  | 1                  | 67.25                        | 1421                         | -                            | -                            | -                            | -                            | -                            | -                            | -                            | -                            | -                             | -                             | -                             |
|             | C6  | 1                  | 278.62                       | 2555                         | -                            | -                            | -                            | -                            | -                            | -                            | -                            | -                            | -                             | -                             | -                             |
|             | C7  | 1                  | 156.71                       | 8937                         | -                            | -                            | -                            | -                            | -                            | -                            | -                            | -                            | -                             | -                             | -                             |
|             | C8  | 2                  | 55.16                        | 454                          | 2905                         | -                            | -                            | -                            | -                            | -                            | -                            | -                            | -                             | -                             | -                             |
|             | C9  | 2                  | 64.52                        | 3727                         | 4391                         | -                            | -                            | -                            | -                            | -                            | -                            | -                            | -                             | -                             | -                             |
|             | C10 | 2                  | 28.88                        | 587.5                        | 9107                         | -                            | -                            | -                            | -                            | -                            | -                            | -                            | -                             | -                             | -                             |
|             | C11 | 1                  | 39.25                        | 1198                         | -                            | -                            | -                            | -                            | -                            | -                            | -                            | -                            | -                             | -                             | -                             |

Note: Tumor measurements are made on MRI images in 3 dimensions, which is used to estimate tumor burden. If no tumor is detected on MRI '0' is recorded. Week 0 is the histotripsy timepoint (7–9 days post inoculation). *n* = 2/11 histotripsy animals still surviving at 7 weeks with no observable tumor were euthanized due to COVID shutdown (ID H10 and H11).
